# Supplementary material
Source: ML conference proceedings conference paper supplement (https://openreview.net/forum?id=ody3RBUuJS)
Supplement: supplementary_material [file attachment]

## 1 A FedGCN Training Algorithm

---

### Algorithm 1 FedGCN Federated Training for Graph Convolutional Network

---

```

// Pre-Training Communication Round
for each client  $k \in [K]$  do in parallel
  | Send  $\llbracket \{\sum_{j \in \mathcal{N}_i} \mathbb{I}_k(c(j)) \cdot \mathbf{A}_{ij} \mathbf{x}_j\}_{i \in \mathcal{V}_k} \rrbracket$  to the server
end
// Server Operation
for  $i \in \mathcal{V}$  do in parallel
  |  $\llbracket \sum_{j \in \mathcal{N}_i} \mathbf{A}_{ij} \mathbf{x}_j \rrbracket = \sum_{d=1}^C \llbracket \sum_{j \in \mathcal{N}_i} \mathbb{I}_k(c(j)) \cdot \mathbf{A}_{ij} \mathbf{x}_j \rrbracket$ 
end
for each client  $k \in [K]$  do in parallel
  | if 1-hop then
    | | Receive  $\llbracket \{\sum_{j \in \mathcal{N}_i} \mathbf{A}_{ij} \mathbf{x}_j\}_{i \in \mathcal{V}_k} \rrbracket$  and decrypt it
  | end
  | if 2-hop then
    | | Receive  $\llbracket \{\sum_{j \in \mathcal{N}_i} \mathbf{A}_{ij} \mathbf{x}_j\}_{i \in \mathcal{N}_{\mathcal{V}_k}} \rrbracket$  and decrypt it
  | end
end
// Training Rounds
for  $t = 1, \dots, T$  do
  for each client  $k \in [K]$  do in parallel
    | Receive  $\llbracket \mathbf{w}^{(t)} \rrbracket$  and decrypt it
    | Set  $\mathbf{w}_k^{(t,0)} = \mathbf{w}^{(t)}$ ,
    | for  $e = 1, \dots, E$  do
      | | Set  $\mathbf{g}_{\mathbf{w}_k}^{(t,e)} = \nabla_{\mathbf{w}_k} f_k(\mathbf{w}_k^{(t,e-1)}; \mathcal{G}_k)$ 
      | |  $\mathbf{w}_k^{(t,e)} = \mathbf{w}_k^{(t,e-1)} - \eta \mathbf{g}_{\mathbf{w}_k}^{(t,e)}$  // Update Parameters
    | end
    | Send  $\llbracket \mathbf{w}_k^{(t,E)} \rrbracket$  to the server
  end
  // Server Operations
  |  $\llbracket \mathbf{w}^{(t+1)} \rrbracket = \frac{1}{K} \sum_{d=1}^C \llbracket \mathbf{w}_k^{(t,E)} \rrbracket$  // Update Global Models
  | Broadcast  $\llbracket \mathbf{w}^{(t+1)} \rrbracket$  to local clients
end

```

---

## 2 B Applications of FedGCN

3 In this section, we discuss three important yet challenging applications of federated graph learning.  
 4 Compared with prior works, our FedGCN can overcome the challenges of each application setting  
 5 without sacrificing accuracy.

### 6 B.1 Millions of Clients with Small Graphs

7 With the development of IoT (Internet-of-Things) devices, many people own several devices that can  
 8 collect, process, and communicate data (e.g., Mobile phones, smartwatches, or computers). Recently,  
 9 smart home devices (e.g. cameras, light bulbs, and smart speakers) have also been adopted by millions  
 10 of users, e.g., to monitor home security, the health care of senior citizens and infants, and package  
 11 delivery. These mobile devices, and the applications that run on them, can also have interactions and  
 12 connect with these IoT devices, e.g., unlocking the front door triggers the living room camera.

13 All these devices and applications are connected and form a graph, in which the devices/applications  
 14 are nodes and their interactions are edges. The information of local devices or applications (node  
 15 features) can then be very privacy sensitive, e.g., it may include video recording, accurate user  
 16 location, and other information about users' personal habits. Federated training keeps the data

17 localized to maintain privacy, while cross-client edges affect the federated training performance with  
18 privacy leakage. Here we take a “client” to mean a single user, who may own several devices or  
19 applications (i.e., nodes in the graph). Millions of devices across multiple users can then be connected,  
20 although each user (client) owns only a few devices, which means there are many edges across clients.  
21 The huge amount of cross-client edges can then seriously affect federated training’s performance.  
22 The condition becomes more serious with the co-optimization of heterogeneous data distribution with  
23 limited local data.

24 Our FedGCN can significantly improve both the convergence time and model accuracy, since it does  
25 not have information loss regardless of the number of clients. Since the number of cross-client edges  
26 increases with the number of clients, prior methods that ignore these edges or communicate (some of)  
27 their information in every round respectively face more information loss and communication costs.

## 28 **B.2 A Few Clients with Large Graphs**

29 Due to privacy regulations (e.g., GDPR in Europe) across countries, some data, e.g., that collected by  
30 Internet services like social networks, needs to be localized in each country or region. Here, each  
31 country represents a client and “nodes” might be citizens of that country who use a particular service,  
32 g., users of a social network. Users in different countries (at different clients) may then interact,  
33 creating a cross-client edge. In this case, a single large country might be able to train models with  
34 sufficient performance using only it’s users’ information, but some small countries might find it hard  
35 to train a good model as they have fewer constituent nodes. Federated learning for training a global  
36 model across countries, i.e., cross-silo federated learning, can help to train models in this setting,  
37 and there are relatively few cross-client edges compared to in-client edges. For example, in social  
38 networks, edges represent the connections between users, and users are more closely connected  
39 within a country. However, the small amount of cross-country (cross-client) edges might seriously  
40 affect the model performance since these edges can be more important for decision-making than the  
41 in-client edges. For example, for anomaly detection on payment records, cross-country transactions  
42 are the key to detecting international money laundering and fraud, and ignoring these edges makes it  
43 impossible to detect these behaviors. FedGCN can take these edges into account and the trainers can  
44 decide if they want these edges based on the edge utility for their tasks.

45 FedGCN only communicates accumulated and homomorphically encrypted neighbor information  
46 at the initial round with better privacy guarantees and can also add differential privacy to better fit  
47 privacy regulations.

## 48 **B.3 Multi-step Distributed Training**

49 In distributed training, the main focus is to train a model with fast computation time and high  
50 accuracy, utilizing the resources of multiple computing servers. Privacy is not a concern in this case.  
51 FedGCN requires much less communication cost compared with distributed training methods (e.g.,  
52 BDS-GCN Wan et al. (2022)) since FedGCN only requires pre-training communication. Moreover,  
53 FedGCN suggests that non-i.i.d. data distributions can further reduce the communication, a since  
54 non-i.i.d. partition results in fewer cross-client edges. FedGCN can first partition the graph to  
55 non-i.i.d. and perform precomputation to minimize the communication cost while maintaining model  
56 accuracy.

## 57 **C Future Directions**

58 Although the FedGCN can overcome the challenges mentioned above, it mainly works on training  
59 accumulation-based models like GCN and GraphSage. There are several open problems in federated  
60 graph learning that need to be explored.

### 61 **C.1 Federated Training of Attention-based GNNs**

62 Attention-based GNNs like GAT (Graph attention network) require calculating the attention weights  
63 of edges during neighbor feature aggregation, where the attention weights are based on the node  
64 features on both sides of edges and attention parameters. The attention parameters are updated at  
65 every training iteration and cannot be simply fixed at the initial round. How to train attention-based

66 GNNs in a federated way with high performance and privacy guarantees is an open challenge and  
 67 promising direction.

## 68 C.2 Neighbor Node and Feature Selection to Optimize System Performance

69 General federated graph learning optimizes the system by only sharing local models, without utilizing  
 70 cross-device graph edge information, which leads to less accurate global models. On the other hand,  
 71 communicating massive additional graph data among devices introduces communication overhead and  
 72 potential privacy leakage. To save the communication cost without affecting the model performance,  
 73 one can select key neighbors and neighbor features to reduce communication costs and remove  
 74 redundant information. For privacy guarantee, if there is one neighbor node, it can be simply dropped  
 75 to avoid private data communication. FedGCN can be extended by using selective communication in  
 76 its pre-training communication round.

## 77 C.3 Integration with K-hop Linear GNN Approximation methods

78 To speed up the local computation speed, L-hop Linear GNN Approximation methods use precompu-  
 79 tation to reduce the training computations by running a simplified GCN ( $A^L X W$  in SGC Wu et al.  
 80 (2019),  $[A X W, A^2 X W, \dots, A^L X W]$  in SIGN Frasca et al. (2020), and  $\Pi X W$  in PPRGo Bo-  
 81 jchevski et al. (2020) where  $\Pi$  is the pre-computed personalized pagerank), but the communication  
 82 cost is not reduced if we perform these methods alone. They are thus a complementary approach  
 83 for efficient GNN training. FedGCN (2-hop, 1-hop) changes the model input ( $A$  and  $X$ ) to reduce  
 84 communication in the FL setting, but the GCN model itself is not simplified. FedGCN can incorporate  
 85 these methods to speed up the local computation, especially in constrained edge devices.

## 86 D Background and Preliminaries

### 87 D.1 Federated Learning

88 Federated learning was first proposed by McMahan et al. (2017), who build decentralized machine  
 89 learning models while keeping personal data on clients. Instead of uploading data to the server for  
 90 centralized training, clients process their local data and occasionally share model updates with the  
 91 server. Weights from a large population of clients are aggregated by the server and combined to  
 92 create an improved global model.

93 The FedAvg algorithm McMahan et al. (2017) is used on the server to combine client updates and  
 94 produce a new global model. At training round  $t$ , a global model  $w^{(t)}$  is sent to  $K$  client devices.

95 At each local iteration  $e$ , every client  $k$  computes the gradient,  $g_{w_k}^{(t,e)}$ , on its local data by using the  
 96 current model  $w_k^{(t,e-1)}$ . For a client learning rate  $\eta$ , the local client update at the  $e$ -th local iteration,  
 97  $w_k^{(t,e)}$ , is given by

$$w_k^{(t,e)} \leftarrow w_k^{(t,e-1)} - \eta g_{w_k}^{(t,e)}. \quad (1)$$

98 After  $E$  local iterations, the server then does an aggregation of clients' local models to obtain a new  
 99 global model,

$$w^{(t+1)} = \frac{1}{K} \sum_{d=1}^C w_k^{(t,E)}. \quad (2)$$

100 The process then advances to the next training round,  $t + 1$ .

### 101 D.2 Graph Convolutional Network

102 A multi-layer Graph Convolutional Network (GCN) (Kipf and Welling, 2016) has the layer-wise  
 103 propagation rule

$$H^{(l+1)} = \phi(AH^{(l)}W^{(l)}). \quad (3)$$

104 The weight adjacency matrix  $A$  can be normalized or non-normalized given the original graph,  
 105 and  $W^{(l)}$  is a layer-specific trainable weight matrix. The activation function is  $\phi$ , typically ReLU

(rectified linear units), with a softmax in the last layer for node classification. The node embedding matrix in the  $l$ -th layer is  $\mathbf{H}^{(l)} \in \mathbb{R}^{N \times d}$ , which contains high-level representations of the graph nodes transformed from the initial features;  $\mathbf{H}^{(0)} = \mathbf{X}$ .

In general, for a GCN with  $L$  layers of the form 3, the output for node  $i$  will depend on neighbors up to  $L$  steps away. We denote this set by  $\mathcal{N}_i^L$  as  $L$ -hop neighbors of  $i$ . Based on this idea, the clients can first communicate the information of nodes. After the communication of information, we can then train the model.

### D.3 Stochastic Block Model

For positive integers  $C$  and  $N$ , a probability vector  $\mathbf{p} \in [0, 1]^C$ , and a symmetric connectivity matrix  $\mathbf{B} \in [0, 1]^{C \times C}$ , the SBM defines a random graph with  $N$  nodes split into  $C$  classes. The goal of a prediction method for the SBM is to correctly divide nodes into their corresponding classes, based on the graph structure. Each node is independently and randomly assigned a class in  $\{1, \dots, C\}$  according to the distribution  $\mathbf{p}$ ; we can then say that a node is a “member” of this class. Undirected edges are independently created between any pair of nodes in classes  $c$  and  $d$  with probability  $B_{cd}$ , where the  $(c, d)$  entry of  $\mathbf{B}$  is

$$B_{cd} = \begin{cases} \alpha, & c = d \\ \mu\alpha, & c \neq d, \end{cases} \quad (4)$$

for  $\alpha \in (0, 1)$  and  $\mu \in (0, 1)$ , implying that the probability of an edge forming between nodes in the same class is  $\alpha$  (which is the same for each class) and the edge formation probability between nodes in different classes is  $\mu\alpha$ .

Let  $\mathbf{Y} \in \{0, 1\}^{N \times C}$  denotes the matrix representing the nodes’ class memberships, where  $Y_{ic} = 1$  indicates that node  $i$  belongs to the  $c$ -th class, and is 0 otherwise. We use  $\mathbf{A} \in \{0, 1\}^{N \times N}$  to denote the (symmetric) adjacency matrix of the graph, where  $A_{ij}$  indicates whether there is a connection (edge) between node  $i$  and node  $j$ . From our node connectivity model, we find that given  $\mathbf{Y}$ , for  $i < j$ , we have

$$A_{ij} | \{Y_{ic} = 1, Y_{jd} = 1\} \sim \text{Ber}(B_{cd}), \quad (5)$$

where  $\text{Ber}(p)$  indicates a Bernoulli random variable with parameter  $p$ . Since all edges are undirected,  $A_{ij} = A_{ji}$ . We further define the connection probability matrix  $\mathbf{P} = \mathbf{Y} \mathbf{B} \mathbf{Y}^T \in [0, 1]^{N \times N}$ , where  $P_{ij}$  is the connection probability of node  $i$  and node  $j$  and  $\mathbb{E}[\mathbf{A}] = \mathbf{P}$ .

## E Training Configuration

### E.1 Statistics of Datasets

| Dataset       | Nodes     | Edges      | Features | Classes |
|---------------|-----------|------------|----------|---------|
| Cora          | 2,708     | 5,429      | 1,433    | 7       |
| Citeseer      | 3,327     | 4,732      | 3,703    | 6       |
| Ogbn-Arxiv    | 169,343   | 1,166,243  | 128      | 40      |
| Ogbn-Products | 2,449,029 | 61,859,140 | 100      | 47      |

Table 1: Statistics of datasets.

### E.2 Experiment Hyperparameters

For Cora and Citeseer, we use a two-layer GCN with ReLU activation for the first and Softmax for the second layer, as in Kipf and Welling (2016). There are 16 hidden units. A dropout layer between the two GCN layers has a dropout rate of 0.5. We use 300 training rounds with the SGD optimizer for all settings with a learning rate of 0.5, L2 regularization  $5 \times 10^{-4}$ , and 3 local steps per round for federated settings. For the OGBN-Arxiv dataset, we instead use a 3-layer GCN with 256 hidden units and 600 training rounds. For the OGBN-Products dataset, we use 2-layer GraphSage, 256 hidden units, and 450 training rounds. All settings are the same as the papers Kipf and Welling (2016); Hu et al. (2020). The local adjacency matrix is normalized by  $\tilde{\mathbf{A}} = \mathbf{D}^{-\frac{1}{2}} \mathbf{A} \mathbf{D}^{-\frac{1}{2}}$  when using GCN. We evaluate the local test accuracy given the local graph  $\mathcal{G}_k$  and get the average test accuracy of all clients as the global test accuracy. We set the number of clients to 10 and averaged over 10 experiment runs.

### 145 E.3 Computation Resource

146 Experiments are done in a p3d.16xlarge instance with 8 GPUs (32GB memory for each GPU) and  
 147 10 g4dn.xlarge instances (16GB GPU memory in each instance). One run of the OGBN-Products  
 148 experiment can take 20 minutes due to full-batch graph training.

## 149 F Communication Cost and Tradeoffs

| Data Distribution    | 0-hop | 1-hop                                               | 2-hop                                                                                        |
|----------------------|-------|-----------------------------------------------------|----------------------------------------------------------------------------------------------|
| Generic Graph        | 0     | $\sum_{i \in \mathcal{V}}  c(\mathcal{N}_i) d + Nd$ | $\sum_{i \in \mathcal{V}}  c(\mathcal{N}_i) d + \sum_{k=1}^K  \mathcal{N}_{\mathcal{V}_k} d$ |
| Non-i.i.d. (SBM)     | 0     | $(c_\mu + 2)Nd$                                     | $2(c_\mu + 1)Nd$                                                                             |
| Partial-i.i.d. (SBM) | 0     | $(c_\alpha p + c_\mu + 2)Nd$                        | $2(c_\alpha p + c_\mu + 1)Nd$                                                                |
| i.i.d. (SBM)         | 0     | $(c_\alpha + c_\mu + 2)Nd$                          | $2(c_\alpha + c_\mu + 1)Nd$                                                                  |

Table 2: Communication costs.  $|\cdot|$  denotes the size of the set and  $\sum_{i \in \mathcal{V}} |c(\mathcal{N}_i)|d$  is the cost of the message that the server received from all clients, where  $c(\mathcal{N}_i)$  denotes the set of clients storing the neighbors of node  $i$ . Communication cost increases with the i.i.d control parameter  $p$ . 2-hop communication has around twice the cost of 1-hop communication.

150 In this appendix, we examine the communication cost, and the resulting convergence-communication  
 151 tradeoff, of FedGCN. As for the convergence analysis in Section ??, we derive communication costs  
 152 for general graphs and then more interpretable results for the SBM model.

153 **Proposition F.1.** (*Communication Cost for FedGCN*) For  $L$ -hop communication of GCNs with  
 154 number of layers  $\geq L$ , the size of messages from  $K$  clients to the server in a generic graph is

$$\sum_{i \in \mathcal{V}} |c(\mathcal{N}_i)|d + \sum_{k=1}^K |\mathcal{N}_k^{L-1}|d, \quad (6)$$

155 where  $c(\mathcal{N}_i)$  denotes the set of clients storing the neighbors of node  $i$ .

156 For a better understanding of the above form, Table 2 gives the approximated (assuming  $\alpha, \mu \ll 1$ )  
 157 size of messages between clients for i.i.d. and non-i.i.d. data, for generic graphs and an SBM with  $N$   
 158 nodes and  $d$ -dimensional node features. Half the partial i.i.d. nodes are chosen in the i.i.d. and half  
 159 the non-i.i.d. settings.

160 Appendix I proves this result. In the non-i.i.d. setting, most nodes with the same labels are stored in  
 161 the same client, which means there are much fewer edges linked to nodes in the other clients than in  
 162 the i.i.d. setting, incurring much less communication cost (specifically,  $c_\alpha Nd$  fewer communications)  
 163 for 1- and 2-hop FedGCN. Note that communication costs vary with  $N$  but not  $K$ , the number of  
 164 clients, as clients communicate directly with the server and not with each other.

165 Combining Table ??’s and Table 2’s results, we observe i.i.d. data reduces the gradient variance but  
 166 increases the communication cost, while the non-i.i.d. setting does the opposite. Approximation  
 167 methods via one-hop communication then might be able to balance the convergence rate and  
 168 communication. We experimentally validate this intuition in Section ??’s results, as well as the  
 169 next appendix section.

## 170 G Additional Experimental Results

### 171 G.1 Validation of Theoretical Analysis on Cora Dataset

172 We validate the qualitative results in main theory and F.1 on the Cora dataset. As shown in Figure 1,  
 173 0-hop FedGCN does not need to communicate but requires high convergence time. One- and 2-hop  
 174 FedGCN have similar convergence time, but 1-hop FedGCN needs much less communication. The  
 175 right graph in Figure 1 shows Table ??’s gradient norm bound for the Cora dataset. We expect these to  
 176 qualitatively follow the same trends as we increase the fraction of i.i.d. data, since from Theorem ??  
 177 the convergence time increases with  $\|\nabla f_k(\mathbf{w}_k) - \nabla f(\mathbf{w})\|$ . FedGCN (2-hop) and FedGCN (0-hop),  
 178 as we would intuitively expect, respectively decrease and increase: as the data becomes more i.i.d.,  
 179 FedGCN (0-hop) has more information loss, while FedGCN (2-hop) gains more useful information

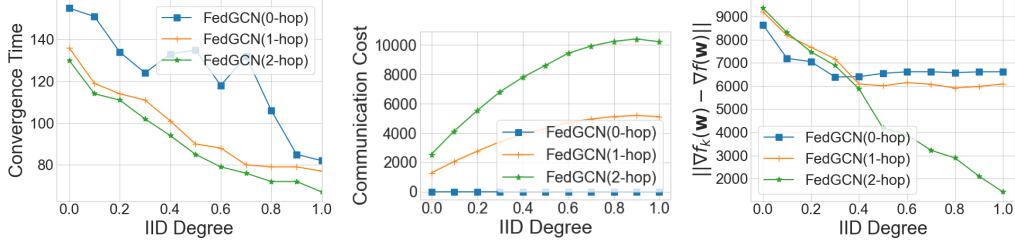

Figure 1: Convergence time (left), communication cost (middle) on Cora, and theoretical convergence upper bound (right, Table ??). FedGCN (1-hop) balances convergence and communication.

180 from cross-client edges. Federated learning also converges faster for i.i.d. data, and we observe that  
 181 FedGCN (0-hop)’s increase in convergence time levels off for  $> 80\%$  i.i.d. data.

## 182 G.2 Homomorphic Encryption Microbenchmarking

| Scheme            | Cheon-Kim-Kim-Song (CKKS) |
|-------------------|---------------------------|
| ring dimension    | 4096                      |
| security level    | HEStd_128_classic         |
| multi depth       | 1                         |
| scale factor bits | 30                        |

Table 3: HE Scheme Parameter Configuration On PALISADE. Multi depth is configured to be 1 for optimal (minimum) maximum possible multiplicative depth in our evaluation.

183 We implement our HE module using the HE library PALISADE (v1.10.5) PALISADE (2020) with  
 184 the cryptocontext parameters configuration as in Table 3. In our paper, we evaluate the real-number  
 185 HE scheme, i.e., the Cheon-Kim-Kim-Song (CKKS) scheme Cheon et al. (2017).

| Array Size | Plaintext (Bool) | Plaintext (Long & Double) | CKKS   | CKKS (Boolean Packing) |
|------------|------------------|---------------------------|--------|------------------------|
| 1k         | 1 kB             | 8 kB                      | 266 kB | 266 kB                 |
| 10k        | 10 kB            | 80 kB                     | 798 kB | 266 kB                 |
| 100k       | 100 kB           | 800 kB                    | 7 MB   | 1 MB                   |
| 1M         | 1 MB             | 8 MB                      | 70 MB  | 8 MB                   |
| 100M       | 100 MB           | 800 MB                    | 7 GB   | 793 MB                 |
| 1B         | 1 GB             | 8 GB                      | 70 GB  | 8 GB                   |

Table 4: Communication Cost Comparison between Plaintext and Encryption: Plaintext files are numpy arrays with pickle and ciphertext files are generated under CKKS.

186 In our framework, neighboring features (long integers, int64) are securely aggregated under the BGV  
 187 scheme and local model parameters (double-precision floating-point, float64) are securely aggregated  
 188 under the CKKS scheme. The microbenchmark results of additional communication overhead can  
 189 be found in Table 4. In general, secure computation using HE yields a nearly 15-fold increase  
 190 of communicational cost compared to insecure communication in a complete view of plaintexts.  
 191 However, with our Boolean Packing technique, the communication overhead only **doubles** for a  
 192 large-size array.

## 193 H Convergence Proof

194 We first give an example of a 1-layer GCN, then we mainly analyze a 2-layer GCN, which is the  
 195 most common architecture for graph neural networks. The intuition of the theory is bounding the  
 196 difference between the local gradient and global gradient in non-i.i.d settings. Our analysis also fits  
 197 any layers of GCN and GraphSage.

## 198 H.1 Convergence Analysis of 1-layer GCNs

199 We first get the gradient of 1-layer GCNs in centralized, 0-hop and 1-hop cases. Then we provide  
200 bounds to approximate the difference between local (0,1-hop) and global gradients.

### 201 H.1.1 Gradient of Centralized GCN (Global Gradient)

202 In centralized training, for a graph  $\mathcal{G}$  with  $N$  nodes and  $d$ -dim feature for each node. It can be also  
203 represented as the adjacency matrix  $\mathbf{A}$  and the feature matrix  $\mathbf{X}$ . We then consider a 1-layer graph  
204 convolutional network with model parameter  $\mathbf{W}$  and softmax activation  $\phi$ , which has the following  
205 form

$$\mathbf{Z} = \mathbf{A}\mathbf{X}\mathbf{W}. \quad (7)$$

206 We then pass it to the softmax activation

$$\mathbf{Q} = \phi(\mathbf{Z}), \quad (8)$$

207 where

$$\mathbf{Q}_{ic} = \frac{e^{\mathbf{Z}_{ic}}}{\sum_{c=1}^C e^{\mathbf{Z}_{ic}}}. \quad (9)$$

208  $\mathbf{Q}_{ic}$  is then the model prediction result for node  $i$  with specific class  $c$ .

209 Let  $f(\mathbf{A}, \mathbf{X}, \mathbf{W}, \mathbf{Y})$  represent the output of the cross-entropy loss, we have

$$f(\mathbf{A}, \mathbf{X}, \mathbf{W}, \mathbf{Y}) = -\frac{1}{N} \sum_{i=1}^N \sum_{c=1}^C \mathbf{Y}_{ic} \log \mathbf{Q}_{ic}. \quad (10)$$

210 **Equation 1** Gradient to the input of softmax layer  $\frac{\partial f}{\partial \mathbf{Z}} = \frac{1}{N}(\mathbf{Q} - \mathbf{Y})$

211 *Proof.* At first, we calculate the gradient of  $f$  given the element  $\mathbf{Z}_{ic}$  of the matrix  $\mathbf{Z}$ ,  $\frac{\partial f}{\partial \mathbf{Z}_{ic}}$ ,

$$\begin{aligned} \frac{\partial f}{\partial \mathbf{Z}_{ic}} &= \frac{\partial(-\frac{1}{N} \sum_{i=1}^N \sum_{c=1}^C \mathbf{Y}_{ic} \log \mathbf{Q}_{ic})}{\partial \mathbf{Z}_{ic}} \\ &= \frac{\partial(-\frac{1}{N} \sum_{i=1}^N \sum_{c=1}^C \mathbf{Y}_{ic} \log \frac{e^{\mathbf{Z}_{ic}}}{\sum_{d=1}^C e^{\mathbf{Z}_{id}}})}{\partial \mathbf{Z}_{ic}} \\ &= \frac{\partial(-\frac{1}{N} \sum_{c=1}^C \mathbf{Y}_{ic} \log \frac{e^{\mathbf{Z}_{ic}}}{\sum_{d=1}^C e^{\mathbf{Z}_{id}}})}{\partial \mathbf{Z}_{ic}} \\ &= -\frac{1}{N} \frac{\partial(\sum_{c=1}^C \mathbf{Y}_{ic} \log \frac{e^{\mathbf{Z}_{ic}}}{\sum_{d=1}^C e^{\mathbf{Z}_{id}}})}{\partial \mathbf{Z}_{ic}} \\ &= -\frac{1}{N} \frac{\partial(\sum_{c=1}^C (\mathbf{Y}_{ic} \mathbf{Z}_{ic} - \mathbf{Y}_{ic} \log \sum_{d=1}^C e^{\mathbf{Z}_{id}}))}{\partial \mathbf{Z}_{ic}} \\ &= -\frac{1}{N} (\mathbf{Y}_{ic} - \frac{\partial(\sum_{c=1}^C (\mathbf{Y}_{ic} \log \sum_{d=1}^C e^{\mathbf{Z}_{id}}))}{\partial \mathbf{Z}_{ic}}) \\ &= -\frac{1}{N} (\mathbf{Y}_{ic} - \frac{\partial(\log \sum_{d=1}^C e^{\mathbf{Z}_{id}})}{\partial \mathbf{Z}_{ic}}) \\ &= -\frac{1}{N} (\mathbf{Y}_{ic} - \frac{e^{\mathbf{Z}_{ic}}}{\sum_{d=1}^C e^{\mathbf{Z}_{id}}}) \\ &= \frac{1}{N} (\frac{e^{\mathbf{Z}_{ic}}}{\sum_{d=1}^C e^{\mathbf{Z}_{id}}} - \mathbf{Y}_{ic}) \\ &= \frac{1}{N} (\mathbf{Q}_{ic} - \mathbf{Y}_{ic}) \end{aligned} \quad (11)$$

212 Given the property of the matrix, we have

$$\frac{\partial f}{\partial \mathbf{Z}} = \frac{1}{N}(\mathbf{Q} - \mathbf{Y}).$$

213

□

**Lemma 1** If  $\mathbf{Z} = \mathbf{A}\mathbf{X}\mathbf{B}$ ,

$$\frac{\partial f}{\partial \mathbf{X}} = \mathbf{A}^T \frac{\partial f}{\partial \mathbf{Z}} \mathbf{B}^T.$$

214 **Equation 2** The gradient over the weights of GCN

$$\frac{\partial f}{\partial \mathbf{W}} = \frac{1}{N} \mathbf{X}^T \mathbf{A}^T (\phi(\mathbf{A}\mathbf{X}\mathbf{W}) - \mathbf{Y}). \quad (12)$$

*Proof.*

$$\begin{aligned} \frac{\partial f}{\partial \mathbf{W}} &= (\mathbf{A}\mathbf{X})^T \frac{\partial f}{\partial \mathbf{Z}} \\ &= \mathbf{X}^T \mathbf{A}^T \frac{\partial f}{\partial \mathbf{Z}} \\ &= \frac{1}{N} \mathbf{X}^T \mathbf{A}^T (\mathbf{Q} - \mathbf{Y}) \\ &= \frac{1}{N} \mathbf{X}^T \mathbf{A}^T (\phi(\mathbf{A}\mathbf{X}\mathbf{W}) - \mathbf{Y}) \end{aligned} \quad (13)$$

215

□

### 216 H.1.2 Gradients of local models with 0-hop communication

217 We then consider the federated setting. Let  $\mathbf{A}^{N \times N}$  denote the adjacency matrix of all nodes and  
 218  $\mathbf{A}_k^{N_k \times N_k}$  denotes the adjacency matrix of the nodes in client  $k$ . Let  $f_k$  represent the local loss function  
 219 (without communication) of client  $k$ . Then the local gradient given model parameter  $\mathbf{W}$  is

$$\frac{\partial f_k}{\partial \mathbf{W}} = \frac{1}{N_k} \mathbf{X}_k^T \mathbf{A}_k^T (\phi(\mathbf{A}_k \mathbf{X}_k \mathbf{W}) - \mathbf{Y}_k) \quad (14)$$

### 220 H.1.3 Gradients of local models with 1-hop communication

221 With 1-hop communication, let  $\dot{\mathbf{A}}_k^{N_k \times |\mathcal{N}_k|}$  denotes the adjacency matrix of the nodes in client  $k$   
 222 and their 1-hop neighbors ( $\mathcal{N}_k$  also includes the current nodes). The output of GCN with 1-hop  
 223 communication (recovering 1-hop neighbor information) is

$$\phi(\dot{\mathbf{A}}_k \dot{\mathbf{X}}_k \mathbf{W}). \quad (15)$$

224 The local gradient with 1-hop communication given model parameter  $\mathbf{W}$  is then

$$\frac{\partial f_k}{\partial \mathbf{W}} = \frac{1}{N_k} \dot{\mathbf{X}}_k^T \dot{\mathbf{A}}_k^T (\phi(\dot{\mathbf{A}}_k \dot{\mathbf{X}}_k \mathbf{W}) - \mathbf{Y}_k) \quad (16)$$

### 225 H.1.4 Bound the difference of local gradient and global gradient

226 Assuming each client has an equal number of nodes, we have  $N_k = \frac{N}{K}$ . The local gradient of 0-hop  
 227 communication is then

$$\frac{\partial f_k}{\partial \mathbf{W}} = \frac{K}{N} \mathbf{X}_k^T \mathbf{A}_k^T (\phi(\mathbf{A}_k \mathbf{X}_k \mathbf{W}) - \mathbf{Y}_k) \quad (17)$$



228 The difference between local gradient (0-hop) and global gradient is then

$$\begin{aligned}
& \left\| \frac{\partial f_k}{\partial \mathbf{W}} - \frac{\partial f}{\partial \mathbf{W}} \right\| \\
&= \left\| \frac{K}{N} \mathbf{X}_k^T \mathbf{A}_k^T (\phi(\mathbf{A}_k \mathbf{X}_k \mathbf{W}) - \mathbf{Y}_k) - \frac{1}{N} \mathbf{X}^T \mathbf{A}^T (\phi(\mathbf{A} \mathbf{X} \mathbf{W}) - \mathbf{Y}) \right\| \\
&= \frac{1}{N} \left\| K \mathbf{X}_k^T \mathbf{A}_k^T (\phi(\mathbf{A}_k \mathbf{X}_k \mathbf{W}) - \mathbf{Y}_k) - \mathbf{X}^T \mathbf{A}^T (\phi(\mathbf{A} \mathbf{X} \mathbf{W}) - \mathbf{Y}) \right\| \\
&= \frac{1}{N} \left\| K \mathbf{X}_k^T \mathbf{A}_k^T \phi(\mathbf{A}_k \mathbf{X}_k \mathbf{W}) - K \mathbf{X}_k^T \mathbf{A}_k^T \mathbf{Y}_k - \mathbf{X}^T \mathbf{A}^T \phi(\mathbf{A} \mathbf{X} \mathbf{W}) + \mathbf{X}^T \mathbf{A}^T \mathbf{Y} \right\| \quad (18) \\
&\leq \frac{1}{N} (\|K \mathbf{X}_k^T \mathbf{A}_k^T \phi(\mathbf{A}_k \mathbf{X}_k \mathbf{W}) - \mathbf{X}^T \mathbf{A}^T \phi(\mathbf{A} \mathbf{X} \mathbf{W})\| + \|\mathbf{X}^T \mathbf{A}^T \mathbf{Y} - K \mathbf{X}_k^T \mathbf{A}_k^T \mathbf{Y}_k\|) \\
&= \frac{1}{N} (\|K \mathbf{X}_k^T \mathbf{A}_k^T \phi(\mathbf{A}_k \mathbf{X}_k \mathbf{W}) - \mathbf{X}^T \mathbf{A}^T \phi(\mathbf{A} \mathbf{X} \mathbf{W})\| + \|K \mathbf{X}_k^T \mathbf{A}_k^T \mathbf{Y}_k - \mathbf{X}^T \mathbf{A}^T \mathbf{Y}\|) \\
&\lesssim \|K \mathbf{X}_k^T \mathbf{A}_k^T \phi(\mathbf{A}_k \mathbf{X}_k \mathbf{W}) - \mathbf{X}^T \mathbf{A}^T \phi(\mathbf{A} \mathbf{X} \mathbf{W})\| + \|K \mathbf{X}_k^T \mathbf{A}_k^T \mathbf{Y}_k - \mathbf{X}^T \mathbf{A}^T \mathbf{Y}\|
\end{aligned}$$

229 Since model training is to make the model output  $\phi(\mathbf{A} \mathbf{X} \mathbf{W})$  close to label matrix  $\mathbf{Y}$ , we provide an  
230 upper bound

$$\|K \mathbf{X}_k^T \mathbf{A}_k^T \mathbf{Y}_k - \mathbf{X}^T \mathbf{A}^T \mathbf{Y}\| \lesssim \|K \mathbf{X}_k^T \mathbf{A}_k^T \phi(\mathbf{A}_k \mathbf{X}_k \mathbf{W}) - \mathbf{X}^T \mathbf{A}^T \phi(\mathbf{A} \mathbf{X} \mathbf{W})\| \quad (19)$$

231 Based on Equation 18 and Equation 19, we then have

$$\left\| \frac{\partial f_k}{\partial \mathbf{W}} - \frac{\partial f}{\partial \mathbf{W}} \right\| \lesssim \|K \mathbf{X}_k^T \mathbf{A}_k^T \phi(\mathbf{A}_k \mathbf{X}_k \mathbf{W}) - \mathbf{X}^T \mathbf{A}^T \phi(\mathbf{A} \mathbf{X} \mathbf{W})\| \quad (20)$$

232 By assuming the function  $\mathbf{X}^T \mathbf{A}^T \phi(\mathbf{A} \mathbf{X} \mathbf{W})$  is  $\lambda$ -smooth w.r.t  $\mathbf{X}^T \mathbf{A}^T \mathbf{A} \mathbf{X}$ , we have

$$\begin{aligned}
\left\| \frac{\partial f_k}{\partial \mathbf{W}} - \frac{\partial f}{\partial \mathbf{W}} \right\| &\lesssim \|K \mathbf{X}_k^T \mathbf{A}_k^T \mathbf{A}_k \mathbf{X}_k \mathbf{W} - \mathbf{X}^T \mathbf{A}^T \mathbf{A} \mathbf{X} \mathbf{W}\| \\
&\lesssim \|K \mathbf{X}_k^T \mathbf{A}_k^T \mathbf{A}_k \mathbf{X}_k - \mathbf{X}^T \mathbf{A}^T \mathbf{A} \mathbf{X}\| \quad (21)
\end{aligned}$$

233 We can then provide the following bound to compare the local gradient with 0-hop communication  
234 and the global gradient given the same model parameter  $\mathbf{w}$

$$\left\| \frac{\partial f_k}{\partial \mathbf{w}} - \frac{\partial f}{\partial \mathbf{w}} \right\| \lesssim \|K \mathbf{X}_k^T \mathbf{A}_k^T \mathbf{A}_k \mathbf{X}_k - \mathbf{X}^T \mathbf{A}^T \mathbf{A} \mathbf{X}\|, \quad (22)$$

235 where  $\mathbf{w}$  is the vectorization of model parameters  $\mathbf{W}$ .

236 Similarly, let  $\dot{f}_k$  represent the loss function with 1-hop communication, the difference between local  
237 gradient with 1-hop communication and the global gradient is

$$\left\| \frac{\partial \dot{f}_k}{\partial \mathbf{w}} - \frac{\partial f}{\partial \mathbf{w}} \right\| \leq \lambda \|K \dot{\mathbf{X}}_k^T \dot{\mathbf{A}}_k^T \dot{\mathbf{A}}_k \dot{\mathbf{X}}_k - \mathbf{X}^T \mathbf{A}^T \mathbf{A} \mathbf{X}\|. \quad (23)$$

## 238 H.2 Convergence Analysis of 2-layer GCNs

239 Based on the same idea in 1-layer GCNs, we then provide the convergence analysis of 2-layer GCNs.  
240 We first derive the gradient of 2-layer GCNs in centralized, 0-hop, 1-hop and 2-hop cases. Then we  
241 provide bounds to approximate the difference between local (0, 1, 2-hop) and global gradients. Based  
242 on the Stochastic Block Model, we then be able to quantify the difference.

### 243 H.2.1 Gradient of Centralized GCN (Global Gradient)

244 Based on the analysis of 1-layer GCNs, for graph  $\mathcal{G}$  with adjacency matrix  $\mathbf{A}$  and feature matrix  $\mathbf{X}$   
245 in clients, we consider a 2-layer graph convolutional network with ReLU activation for the first layer,  
246 Softmax activation for the second layer, and cross-entropy loss, which has the following form

$$\mathbf{Z} = \mathbf{A} \phi_1(\mathbf{A} \mathbf{X} \mathbf{W}_1) \mathbf{W}_2, \quad (24)$$

247

$$\mathbf{Q} = \phi_2(\mathbf{Z}), \quad (25)$$

248 where

$$\mathbf{Q}_{ic} = \frac{e^{\mathbf{Z}_{ic}}}{\sum_{d=1}^C e^{\mathbf{Z}_{id}}} \quad (26)$$

249 The objective function is

$$f(\mathbf{A}, \mathbf{X}, \mathbf{W}_1, \mathbf{W}_2, \mathbf{Y}) = -\frac{1}{N} \sum_{i=1}^N \sum_{c=1}^C \mathbf{Y}_{ic} \log \mathbf{Q}_{ic}. \quad (27)$$

250 We then show how to calculate the gradient  $\nabla f(\mathbf{w}) = [\frac{\partial f}{\partial \mathbf{W}_1}, \frac{\partial f}{\partial \mathbf{W}_2}]$ .251 **Equation 1**  $\frac{\partial f}{\partial \mathbf{Z}} = \frac{1}{N}(\mathbf{Q} - \mathbf{Y})$ 252 **Equation 2** The gradient over the weights of the second layer

$$\frac{\partial f}{\partial \mathbf{W}_2} = \frac{1}{N}(\phi_1(\mathbf{W}_1^T \mathbf{X}^T \mathbf{A}^T)) \mathbf{A}^T (\phi_2(\mathbf{A} \phi_1(\mathbf{A} \mathbf{X} \mathbf{W}_1) \mathbf{W}_2) - \mathbf{Y}) \quad (28)$$

*Proof.*

$$\begin{aligned} \frac{\partial f}{\partial \mathbf{W}_2} &= (\mathbf{A} \phi_1(\mathbf{A} \mathbf{X} \mathbf{W}_1))^T \frac{\partial f}{\partial \mathbf{Z}} \\ &= (\phi_1(\mathbf{A} \mathbf{X} \mathbf{W}_1))^T \mathbf{A}^T \frac{\partial f}{\partial \mathbf{Z}} \\ &= \frac{1}{N} (\phi_1(\mathbf{A} \mathbf{X} \mathbf{W}_1))^T \mathbf{A}^T (\mathbf{Q} - \mathbf{Y}) \\ &= \frac{1}{N} (\phi_1(\mathbf{A} \mathbf{X} \mathbf{W}_1))^T \mathbf{A}^T (\phi_2(\mathbf{A} \phi_1(\mathbf{A} \mathbf{X} \mathbf{W}_1) \mathbf{W}_2) - \mathbf{Y}) \\ &= \frac{1}{N} (\phi_1(\mathbf{W}_1^T \mathbf{X}^T \mathbf{A}^T)) \mathbf{A}^T (\phi_2(\mathbf{A} \phi_1(\mathbf{A} \mathbf{X} \mathbf{W}_1) \mathbf{W}_2) - \mathbf{Y}) \end{aligned} \quad (29)$$

253

□

254 **Equation 3** The gradient over the weights of the first layer.

$$\frac{\partial f}{\partial \mathbf{W}_1} = \frac{1}{N} (\mathbf{A} \phi'_1(\mathbf{A} \mathbf{X} \mathbf{W}_1) \mathbf{A} \mathbf{X})^T (\phi_2(\mathbf{A} \phi_1(\mathbf{A} \mathbf{X} \mathbf{W}_1) \mathbf{W}_2) - \mathbf{Y}) \mathbf{W}_2^T \quad (30)$$

*Proof.*

$$\begin{aligned} \frac{\partial f}{\partial \mathbf{W}_1} &= (\mathbf{A} \phi'_1(\mathbf{A} \mathbf{X} \mathbf{W}_1) \mathbf{A} \mathbf{X})^T \frac{\partial f}{\partial \mathbf{Z}} \mathbf{W}_2^T \\ &= (\mathbf{A} \phi'_1(\mathbf{A} \mathbf{X} \mathbf{W}_1) \mathbf{A} \mathbf{X})^T \frac{\partial f}{\partial \mathbf{Z}} \mathbf{W}_2^T \\ &= \frac{1}{N} (\mathbf{A} \phi'_1(\mathbf{A} \mathbf{X} \mathbf{W}_1) \mathbf{A} \mathbf{X})^T (\mathbf{Q} - \mathbf{Y}) \mathbf{W}_2^T \\ &= \frac{1}{N} (\mathbf{A} \phi'_1(\mathbf{A} \mathbf{X} \mathbf{W}_1) \mathbf{A} \mathbf{X})^T (\phi_2(\mathbf{A} \phi_1(\mathbf{A} \mathbf{X} \mathbf{W}_1) \mathbf{W}_2) - \mathbf{Y}) \mathbf{W}_2^T \end{aligned} \quad (31)$$

255

□

256 **H.2.2 Gradient of local models (0, 1, 2-hop)**

257 For client  $k$  with local adjacency matrix  $\mathbf{A}_k$ , let  $\dot{\mathbf{A}}_k^{n \times |\mathcal{N}_k|}$  denotes the adjacency matrix of the current  
 258 nodes with complete edge information form their 1-hop neighbors ( $\mathcal{N}_k$  also includes the current  
 259 nodes), and  $\dot{\mathbf{A}}_k^{|\mathcal{N}_k| \times |\mathcal{N}_k^2|}$  denotes the adjacency matrix of nodes with complete edge information form  
 260 their 2-hop neighbors ( $\mathcal{N}_k^2$  also includes the current nodes and 1-hop neighbors).

261 The output of GCN without communication is

$$\phi_2(\mathbf{A}_k \phi_1(\mathbf{A}_k \mathbf{X}_k \mathbf{W}_1) \mathbf{W}_2). \quad (32)$$

262 The output of GCN with 1-hop communication is

$$\phi_2(\mathbf{A}_k \phi_1(\dot{\mathbf{A}}_k \dot{\mathbf{X}}_k \mathbf{W}_1) \mathbf{W}_2). \quad (33)$$

263 The output of GCN with 2-hop communication is

$$\phi_2(\dot{\mathbf{A}}_k \phi_1(\ddot{\mathbf{A}}_k \ddot{\mathbf{X}}_k \mathbf{W}_1) \mathbf{W}_2). \quad (34)$$

264 For 2-layer GCNs, output with 2-hop communication is the same as the centralized model.

265 The gradient of GCNs with 2-hop communication (recover the 2-hop neighbor information) over the  
266 weights of the first layer is then

$$\frac{\partial \ddot{f}_k}{\partial \mathbf{W}_1} = \frac{1}{N_k} (\dot{\mathbf{A}}_k \phi_1'(\ddot{\mathbf{A}}_k \ddot{\mathbf{X}}_k \mathbf{W}_1) \ddot{\mathbf{A}}_k \ddot{\mathbf{X}}_k)^T (\phi_2(\dot{\mathbf{A}}_k \phi_1(\ddot{\mathbf{A}}_k \ddot{\mathbf{X}}_k \mathbf{W}_1) \mathbf{W}_2) - \mathbf{Y}_k) \mathbf{W}_2^T. \quad (35)$$

### 267 H.2.3 Bound the difference of local gradient and global gradient

268 Assuming each client has equal number of nodes, we have  $N_k = \frac{N}{K}$ . Based on the same process in  
269 1-layer case, we can then provide the following approximations between the local model and the  
270 global model.

271 The difference between the local gradient without communication and the global gradient is

$$\left\| \frac{\partial f_k}{\partial \mathbf{w}} - \frac{\partial f}{\partial \mathbf{w}} \right\| \lesssim \|K \mathbf{X}_k^T \mathbf{A}_k^T \mathbf{A}_k^T \mathbf{A}_k \mathbf{A}_k \mathbf{X}_k - \mathbf{X}^T \mathbf{A}^T \mathbf{A}^T \mathbf{A} \mathbf{A} \mathbf{X}\|. \quad (36)$$

272 The difference between the local gradient with 1-hop communication and the global gradient is

$$\left\| \frac{\partial \dot{f}_k}{\partial \mathbf{w}} - \frac{\partial f}{\partial \mathbf{w}} \right\| \lesssim \|K \dot{\mathbf{X}}_k^T \dot{\mathbf{A}}_k^T \mathbf{A}_k^T \mathbf{A}_k \dot{\mathbf{A}}_k \dot{\mathbf{X}}_k - \mathbf{X}^T \mathbf{A}^T \mathbf{A}^T \mathbf{A} \mathbf{A} \mathbf{X}\|. \quad (37)$$

273 The difference between the local gradient with 2-hop communication and the global gradient is

$$\left\| \frac{\partial \ddot{f}_k}{\partial \mathbf{w}} - \frac{\partial f}{\partial \mathbf{w}} \right\| \lesssim \|K \ddot{\mathbf{X}}_k^T \ddot{\mathbf{A}}_k^T \mathbf{A}_k^T \dot{\mathbf{A}}_k \ddot{\mathbf{A}}_k \ddot{\mathbf{X}}_k - \mathbf{X}^T \mathbf{A}^T \mathbf{A}^T \mathbf{A} \mathbf{A} \mathbf{X}\|. \quad (38)$$

274 With more communication, the local gradient gets closer to the global gradient.

## 275 H.3 Analysis on Stochastic Block Model with Node Features

276 To better quantify the difference, we can analyze it on generated graphs, the Stochastic Block Model.

### 277 H.3.1 Preliminaries

278 Assume the node feature vector  $\mathbf{x}$  follows the Gaussian distribution with linear projection  $\mathbf{H}$  of node  
279 label  $\mathbf{y}$ ,

$$\mathbf{x} \sim \mathcal{N}(\mathbf{H}\mathbf{y}, \sigma), \quad (39)$$

280 we then have the expectation of the feature matrix

$$E(\mathbf{X}) = E(\mathbf{Y}\mathbf{H}^T). \quad (40)$$

281 According to the Stochastic Block Model, we have

$$E(\mathbf{A}) = \mathbf{P} = \mathbf{Y}\mathbf{B}\mathbf{Y}^T. \quad (41)$$

### 282 H.3.2 Quantify the gradient difference

283 Based on above results, the expectation of the global gradient given the label matrix  $\mathbf{Y}$  is

$$E(\mathbf{X}^T \mathbf{A}^T \mathbf{A}^T \mathbf{A} \mathbf{A} \mathbf{X} | \mathbf{Y}) = \mathbf{H}\mathbf{Y}^T \mathbf{Y} \mathbf{B} \mathbf{Y}^T \mathbf{Y} \mathbf{B} \mathbf{Y}^T \mathbf{Y} \mathbf{B} \mathbf{Y}^T \mathbf{Y} \mathbf{B} \mathbf{Y}^T \mathbf{Y} \mathbf{H}^T. \quad (42)$$

284 Notice that  $\mathbf{Y}^T \mathbf{Y}$  is counting the number of nodes belonging to each class. Based on this observation,  
 285 we can better analyze the data distribution.

286 For adjacency matrix without communication

$$E(\mathbf{A}_k) = \mathbf{Y}_k \mathbf{B} \mathbf{Y}_k^T. \quad (43)$$

287 The expectation of the former gradient given the label matrix  $\mathbf{Y}$  is then

$$E(\mathbf{X}_k^T \mathbf{A}_k^T \mathbf{A}_k^T \mathbf{A}_k \mathbf{A}_k \mathbf{X}_k | \mathbf{Y}) = \mathbf{H} \mathbf{Y}_k^T \mathbf{Y}_k \mathbf{B} \mathbf{Y}_k^T \mathbf{Y}_k \mathbf{B} \mathbf{Y}_k^T \mathbf{Y}_k \mathbf{B} \mathbf{Y}_k^T \mathbf{Y}_k \mathbf{B} \mathbf{Y}_k^T \mathbf{Y}_k \mathbf{H}^T. \quad (44)$$

288 For adjacency matrix with 1-hop communication

$$E(\dot{\mathbf{A}}_k) = \mathbf{Y}_k \dot{\mathbf{B}} \mathbf{Y}_k^T \quad (45)$$

289 The expectation of the former gradient with 1-hop communication given the label matrix  $\mathbf{Y}$  is then

$$\begin{aligned} E(\dot{\mathbf{X}}_k^T \dot{\mathbf{A}}_k^T \mathbf{A}_k^T \mathbf{A}_k \dot{\mathbf{A}}_k \dot{\mathbf{X}}_k | \mathbf{Y}) \\ = \mathbf{H} \dot{\mathbf{Y}}_k^T \dot{\mathbf{Y}}_k \mathbf{B} \dot{\mathbf{Y}}_k^T \mathbf{Y}_k \mathbf{B} \mathbf{Y}_k^T \mathbf{Y}_k \mathbf{B} \mathbf{Y}_k^T \mathbf{Y}_k \mathbf{B} \dot{\mathbf{Y}}_k^T \dot{\mathbf{Y}}_k \mathbf{H}^T. \end{aligned} \quad (46)$$

290 For adjacency matrix with 2-hop communication

$$E(\ddot{\mathbf{A}}_k) = \dot{\mathbf{Y}} \mathbf{B} \ddot{\mathbf{Y}}^T. \quad (47)$$

291 The expectation of the former gradient with 1-hop communication given the label matrix  $\mathbf{Y}$  is then

$$\begin{aligned} E(\ddot{\mathbf{X}}_k^T \ddot{\mathbf{A}}_k^T \dot{\mathbf{A}}_k^T \dot{\mathbf{A}}_k \ddot{\mathbf{A}}_k \ddot{\mathbf{X}}_k | \mathbf{Y}) \\ = \mathbf{H} \ddot{\mathbf{Y}}_k^T \ddot{\mathbf{Y}}_k \mathbf{B} \dot{\mathbf{Y}}_k^T \dot{\mathbf{Y}}_k \mathbf{B} \mathbf{Y}_k^T \mathbf{Y}_k \mathbf{B} \dot{\mathbf{Y}}_k^T \dot{\mathbf{Y}}_k \mathbf{B} \ddot{\mathbf{Y}}_k^T \ddot{\mathbf{Y}}_k \mathbf{H}. \end{aligned} \quad (48)$$

292 The difference of gradient can then be written as

$$\begin{aligned} \left\| \frac{\partial \ddot{f}_k}{\partial \mathbf{w}} - \frac{\partial f}{\partial \mathbf{w}} \right\| \leq \lambda \left\| K \ddot{\mathbf{Y}}_k^T \ddot{\mathbf{Y}}_k \mathbf{B} \dot{\mathbf{Y}}_k^T \dot{\mathbf{Y}}_k \mathbf{B} \mathbf{Y}_k^T \mathbf{Y}_k \mathbf{B} \dot{\mathbf{Y}}_k^T \dot{\mathbf{Y}}_k \mathbf{B} \ddot{\mathbf{Y}}_k^T \ddot{\mathbf{Y}}_k \right. \\ \left. - \mathbf{Y}^T \mathbf{Y} \mathbf{B} \mathbf{Y}^T \mathbf{Y} \mathbf{B} \mathbf{Y}^T \mathbf{Y} \mathbf{B} \mathbf{Y}^T \mathbf{Y} \mathbf{B} \mathbf{Y}^T \mathbf{Y} \right\| \end{aligned} \quad (49)$$

293 Notice that  $\mathbf{Y}_k^T \mathbf{Y}_k$  is counting the number of nodes in client  $k$  belonging to each class,  $\dot{\mathbf{Y}}_k^T \dot{\mathbf{Y}}_k$  and  
 294  $\ddot{\mathbf{Y}}_k^T \ddot{\mathbf{Y}}_k$  are respectively counting the number of 1-hop and 2-hop neighbors of nodes in client  $k$   
 295 belonging to each class. It can be decomposed as

$$\mathbf{Y}_k^T \mathbf{Y}_k = N_k \mathbf{p}_k, \quad (50)$$

296 We then have

$$\begin{aligned} \left\| \frac{\partial \ddot{f}_k}{\partial \mathbf{w}} - \frac{\partial f}{\partial \mathbf{w}} \right\| &\lesssim \| K \mathcal{N}_{\mathcal{V}_k}^2 \mathbf{p}_k \mathcal{N}_{\mathcal{V}_k}^1 \mathbf{p}_k N_k \mathbf{p}_k \mathcal{N}_{\mathcal{V}_k}^1 \mathbf{p}_k \mathcal{N}_{\mathcal{V}_k}^2 \mathbf{p}_k - N^5 \mathbf{p}^5 \| \| \mathbf{B}^4 \| \\ &\lesssim \| K N_k (\mathcal{N}_{\mathcal{V}_k}^1)^2 (\mathcal{N}_{\mathcal{V}_k}^2)^2 (\mathbf{p}_k)^5 - N^5 \mathbf{p}^5 \| \\ &\lesssim \| (K N_k (\mathcal{N}_{\mathcal{V}_k}^1)^2 (\mathcal{N}_{\mathcal{V}_k}^2)^2 - N^5) (\mathbf{p}_k)^5 \| + N^5 \| (\mathbf{p}_k)^5 - \mathbf{p}^5 \| \end{aligned} \quad (51)$$

297  $(K N_k (\mathcal{N}_{\mathcal{V}_k}^1)^2 (\mathcal{N}_{\mathcal{V}_k}^2)^2 - N^5)$  evaluates the difference between the number of nodes with communica-  
 298 tion in local client and the number of nodes in total.  $\| (\mathbf{p}_k)^5 - \mathbf{p}^5 \|$  evaluates the difference between  
 299 local distribution and global distribution. The second term can be bounded by

$$N^5 \| (\mathbf{p}_k)^5 - \mathbf{p}^5 \| \leq N^5 \left(1 - \frac{1}{C}\right)^{\frac{5}{2}} (1 - p)^5. \quad (52)$$

300 We then work on bounding the first term.

#### 301 **H.4 Number of 1-hop and 2-hop neighbors for clients**

302 We need to get the number of 1-hop neighbors  $\mathcal{N}_{\mathcal{V}_k}^1$  and 2-hop neighbors  $\mathcal{N}_{\mathcal{V}_k}^2$  in both i.i.d and  
 303 non-i.i.d cases.

##### 304 **H.4.1 Number of 1-hop and 2-hop neighbors in i.i.d**

305 For node  $i$  in other clients, the probability that it has at least one connection with the nodes in client  $i$

$$1 - (1 - \alpha)^{\frac{N}{CK}} (1 - \mu\alpha)^{\frac{(C-1)N}{CK}} \quad (53)$$

306 The expectation of 1-hop neighbor (including nodes in local client)

$$\begin{aligned} \frac{N}{K} + \frac{K-1}{K} N (1 - (1 - \alpha)^{\frac{N}{CK}} (1 - \mu\alpha)^{\frac{(C-1)N}{CK}}) &\approx \frac{N}{K} + \frac{K-1}{K} N (1 - (1 - \alpha \frac{N}{CK}) (1 - \mu\alpha \frac{(C-1)N}{CK})) \\ &\approx \frac{N}{K} + \frac{K-1}{K} N (1 - (1 - \alpha \frac{N}{CK} - \mu\alpha \frac{(C-1)N}{CK})) \\ &= \frac{N}{K} + \frac{K-1}{K} N (\alpha \frac{N}{CK} + \mu\alpha \frac{(C-1)N}{CK}) \\ &= \frac{N}{K} (1 + (K-1)(\alpha \frac{N}{CK} + \mu\alpha \frac{(C-1)N}{CK})) \end{aligned} \quad (54)$$

307 Notice that it is  $(1 + (K-1)(\alpha \frac{N}{CK} + \mu\alpha \frac{(C-1)N}{CK}))$  times the number of local nodes.

308 Similarly, approximated expectation of 2-hop neighbor (including nodes in local client). This  
 309 approximation is provided based on that in expectation there is no label distribution shift between  
 310 2-hop nodes and 1-hop nodes.

$$\frac{N}{K} (1 + (K-1)(\alpha \frac{N}{CK} + \mu\alpha \frac{(C-1)N}{CK}))^2 \quad (55)$$

##### 311 **H.4.2 Number of 1-hop and 2-hop neighbors in non-i.i.d.**

312 Expectation of 1-hop neighbor (including nodes in local client)

$$\begin{aligned} \frac{N}{K} + \frac{K-1}{K} N (1 - (1 - \mu\alpha)^{\frac{N}{K}}) \\ \approx \frac{N}{K} (1 + \mu\alpha \frac{K-1}{K} N) \end{aligned} \quad (56)$$

313 Approximated expectation of 2-hop neighbor (Including nodes in local client).

$$\frac{N}{K} (1 + \mu\alpha \frac{K-1}{K} N)^2 \quad (57)$$

##### 314 **H.4.3 Number of 1-hop and 2-hop neighbors in non-i.i.d.**

315 Expectation of 1-hop neighbor (including nodes in local client)

$$\begin{aligned} \frac{N}{K} + \frac{K-1}{K} N (1 - (1 - \alpha)^{\frac{Np}{CK}} (1 - \mu\alpha)^{\frac{N(C-p)}{CK}}) &\approx \frac{N}{K} + \frac{K-1}{K} N (\alpha \frac{N}{CK} ((1 - \mu)p + \mu C)) \\ &= \frac{N}{K} + \frac{K-1}{K} N (\alpha \frac{N}{CK} (1 - \mu)p + \alpha \frac{N}{CK} \mu C) \\ &= \frac{N}{K} (1 + (K-1)(\alpha \frac{N}{CK} (1 - \mu)p + \mu\alpha \frac{N}{K})) \end{aligned} \quad (58)$$

316 Approximated expectation of 2-hop neighbor (including nodes in local client)

$$\frac{N}{K} (1 + (K-1)(\alpha \frac{N}{CK} (1 - \mu)p + \mu\alpha \frac{N}{K}))^2 \quad (59)$$

## 317 H.5 Data Distribution with Labels

318 We assume each label have the same number of nodes. Each client  $k$  have the same number of nodes  
 319  $N_k = \frac{N}{K}$ .

320 For global label distribution, we have

$$\mathbf{p} = \text{diag}(\frac{1}{C}, \dots, \frac{1}{C}) \quad (60)$$

### 321 H.5.1 i.i.d

322 The local label distribution is the same as the global distribution in i.i.d condition.

$$\mathbf{p}_k = \text{diag}(\frac{1}{C}, \dots, \frac{1}{C}) \quad (61)$$

323 For local gradient without communication and global gradient,

$$\begin{aligned} \|\frac{\partial f_k}{\partial \mathbf{w}} - \frac{\partial f}{\partial \mathbf{w}}\| &\lesssim \|(K(N_k)^5 - N^5)\text{diag}(\frac{1}{C}, \dots, \frac{1}{C})^5 \mathbf{B}^4\| \\ &\lesssim (1 - K \frac{(N_k)^5}{N^5}) N^5 \|\text{diag}(\frac{1}{C}, \dots, \frac{1}{C})^5 \mathbf{B}^4\| \\ &\lesssim (1 - K \frac{(N_k)^5}{N^5}) \frac{N^5}{C^5} \|\mathbf{B}^4\| \\ &\lesssim (1 - \frac{1}{K^4}) \frac{N^5}{C^5} \|\mathbf{B}^4\| \end{aligned} \quad (62)$$

324 For local gradient with 1-hop communication and global gradient,

$$\begin{aligned} \|\frac{\partial \dot{f}_k}{\partial \mathbf{w}} - \frac{\partial f}{\partial \mathbf{w}}\| &\lesssim \|(K(N_k)^3 |\mathcal{N}_k|^2 - N^5)\text{diag}(\frac{1}{C}, \dots, \frac{1}{C})^5 \mathbf{B}^4\| \\ &\lesssim \|(K \frac{N^3}{K^3} (\frac{N}{C} + \frac{C-1}{C} N (\alpha \frac{N}{C} + \mu \alpha \frac{(C-1)N}{CK}))^2 - N^5)\text{diag}(\frac{1}{C}, \dots, \frac{1}{C})^5 \mathbf{B}^4\| \\ &\lesssim \|(C \frac{N^5}{C^5} (1 + (C-1)(\alpha \frac{N}{C} + \mu \alpha \frac{(C-1)N}{CK}))^2 - N^5)\text{diag}(\frac{1}{C}, \dots, \frac{1}{C})^5 \mathbf{B}^4\| \\ &\lesssim (1 - \frac{1}{C^4} (1 + (C-1)(\alpha \frac{N}{C} + \mu \alpha \frac{(C-1)N}{CK}))^2) \frac{N^5}{C^5} \|\mathbf{B}^4\| \end{aligned} \quad (63)$$

325 For local gradient with 2-hop communication and global gradient,

$$\begin{aligned} \|\frac{\partial \ddot{f}_k}{\partial \mathbf{w}} - \frac{\partial f}{\partial \mathbf{w}}\| &\lesssim \|(K(N_k) |\mathcal{N}_k|^2 |\mathcal{N}_k^2|^2 - N^5)\text{diag}(\frac{1}{C}, \dots, \frac{1}{C})^5 \mathbf{B}^4\| \\ &\lesssim \|(K \frac{N}{C} (\frac{N}{C} + \frac{C-1}{C} N (\alpha \frac{N}{C} + \mu \alpha \frac{(C-1)N}{CK}))^2 \\ &\quad ((\frac{N}{C} + \frac{C-1}{C} N (\alpha \frac{N}{C} + \mu \alpha \frac{(C-1)N}{CK}))^2)^2 - N^5)\text{diag}(\frac{1}{C}, \dots, \frac{1}{C})^5 \mathbf{B}^4\| \\ &\lesssim \|(K \frac{N^5}{C^5} (1 + (C-1)(\alpha \frac{N}{C} + \mu \alpha \frac{(C-1)N}{CK}))^6 - N^5)\text{diag}(\frac{1}{C}, \dots, \frac{1}{C})^5 \mathbf{B}^4\| \\ &\lesssim (1 - \frac{1}{C^4} (1 + (C-1)(\alpha \frac{N}{C} + \mu \alpha \frac{(C-1)N}{CK}))^6) \frac{N^5}{C^5} \|\mathbf{B}^4\| \end{aligned} \quad (64)$$

326 For non-i.i.d, we can simply replace the number of 1-hop and 2-hop neighbors.

## I Communication Cost under SBM

Assume the number of clients  $K$  is equal to the number of labels types in the graph  $G$ . Table 5 shows the communication cost of FedGCN and BDS-GCN Wan et al. (2022). Distributed training methods like BDS-GCN requires communication per local update, which makes the communication cost increase linearly with the number of global training round  $T$  and number of local updates  $E$ . FedGCN only requires low communication cost at the initial step.

| Methods       | 1-hop      | $L$ -hop                                    | BDS-GCN                                                  |
|---------------|------------|---------------------------------------------|----------------------------------------------------------|
| Generic Graph | $C_1 + Nd$ | $C_1 + \sum_{k=1}^K  \mathcal{N}_k^{L-1} d$ | $LTE\rho d \sum_{k=1}^K  \mathcal{N}_k^1/\mathcal{V}_k $ |

Table 5: Communication costs of FedGCN and BDS-GCN on generic graph. BDS-GCN requires communication at every local updates.

### I.1 Server Aggregation

We consider communication cost of node  $i$  in client  $c(i)$ . For node  $i$ , the server needs to receive messages from  $c(i)$  (note that  $c(i)$  needs send the local neighbor aggregation) and other clients containing the neighbors of node  $i$ .

#### I.1.1 Non-i.i.d.

Possibility that there is no connected node in client  $j$  for node  $i$  is

$$(1 - \mu\alpha)^{\frac{N}{K}}. \quad (65)$$

Possibility that there is at least one connected node in client  $j$  for node  $i$  is

$$1 - (1 - \mu\alpha)^{\frac{N}{K}}. \quad (66)$$

Number of clients that node  $i$  needs to communicate with is

$$1 + (K - 1)(1 - (1 - \mu\alpha)^{\frac{N}{K}}). \quad (67)$$

The communication cost of  $N$  nodes is

$$N(1 + (K - 1)(1 - (1 - \mu\alpha)^{\frac{N}{K}}))d. \quad (68)$$

**1-order Approximation** To better understanding the communication cost, we can expand the form to provide 1-order approximation

$$(1 - \mu\alpha)^{\frac{N}{K}} \approx 1 - \mu\alpha \frac{N}{K} \quad (69)$$

Possibility that there is no connected node in client  $j$  for node  $i$  is

$$1 - (1 - \mu\alpha)^{\frac{N}{K}} \approx 1 - 1 + \mu\alpha \frac{N}{K} = \mu\alpha \frac{N}{K}. \quad (70)$$

The number of clients that node  $i$  needs to communicate with is then

$$1 + (K - 1)(1 - (1 - \mu\alpha)^{\frac{N}{K}}) \approx 1 + (K - 1)\mu\alpha \frac{N}{K}. \quad (71)$$

#### I.1.2 i.i.d.

Possibility that there is no connected node in client  $j$  for node  $i$  is

$$(1 - \alpha)^{\frac{N}{CK}} (1 - \mu\alpha)^{\frac{(C-1)N}{CK}}. \quad (72)$$

348 Possibility that there is at least one connected node in client  $j$  for node  $i$  is

$$1 - (1 - \alpha)^{\frac{N}{CK}} (1 - \mu\alpha)^{\frac{(C-1)N}{CK}}. \quad (73)$$

349 Number of clients that node  $i$  needs to communicate with is

$$1 + (C - 1)(1 - (1 - \alpha)^{\frac{N}{CK}} (1 - \mu\alpha)^{\frac{(C-1)N}{CK}}). \quad (74)$$

350 Node  $i$  needs to communicate with more clients in i.i.d. than the case in non-i.i.d.

351 The communication cost of  $N$  nodes is

$$N(1 + (C - 1)(1 - (1 - \alpha)^{\frac{N}{CK}} (1 - \mu\alpha)^{\frac{(C-1)N}{CK}}))d. \quad (75)$$

### 352 **1-order Approximation**

353 The number of clients that node  $i$  needs to communicate with is then

$$\begin{aligned} 1 - (1 - \alpha)^{\frac{N}{CK}} (1 - \mu\alpha)^{\frac{(C-1)N}{CK}} &\approx 1 - (1 - \alpha \frac{N}{CK})(1 - \mu\alpha \frac{(C-1)N}{CK}) \\ &= 1 - (1 - \alpha \frac{N}{CK} - \mu\alpha \frac{(C-1)N}{CK} + \alpha \frac{N}{CK} \mu\alpha \frac{(C-1)N}{CK}) \\ &= \alpha \frac{N}{CK} + \mu\alpha \frac{(C-1)N}{CK} - \alpha \frac{N}{CK} \mu\alpha \frac{(C-1)N}{CK} \\ &\approx \alpha \frac{N}{CK} + \mu\alpha \frac{(C-1)N}{CK}. \end{aligned} \quad (76)$$

354 The number of clients that node  $i$  needs to communicate with is then

$$(1 + (C - 1)(\alpha \frac{N}{CK} + \mu\alpha \frac{(C-1)N}{CK})). \quad (77)$$

### 355 **I.1.3 Non-i.i.d.**

356 Similarly, let  $p$  denote the percent of i.i.d., we then have the communication cost

$$N(1 + (C - 1)(1 - (1 - \alpha)^{\frac{Np}{CK}} (1 - \mu\alpha)^{\frac{N(C-p)}{CK}}))d. \quad (78)$$

### 357 **1-order Approximation**

358 The number of clients that node  $i$  needs to communicate with is then

$$\begin{aligned} 1 - (1 - \alpha)^{\frac{Np}{CK}} (1 - \mu\alpha)^{\frac{N(C-p)}{CK}} &\approx 1 - (1 - \alpha \frac{Np}{CK})(1 - \mu\alpha \frac{N(C-p)}{CK}) \\ &= 1 - (1 - \alpha \frac{Np}{CK} - \mu\alpha \frac{N(C-p)}{CK} + \alpha \frac{Np}{CK} \mu\alpha \frac{N(C-p)}{CK}) \\ &= \alpha \frac{Np}{CK} + \mu\alpha \frac{N(C-p)}{CK} - \alpha \frac{Np}{CK} \mu\alpha \frac{N(C-p)}{CK} \\ &\approx \alpha \frac{Np}{CK} + \mu\alpha \frac{N(C-p)}{CK} \\ &= \alpha \frac{N}{CK} (p + \mu(C - p)) \\ &= \alpha \frac{N}{CK} (p - \mu p + \mu C) \\ &= \alpha \frac{N}{CK} ((1 - \mu)p + \mu C). \end{aligned} \quad (79)$$



359 The communication cost of all nodes is then

$$\begin{aligned}
N(1 + (C - 1)\alpha \frac{N}{CK}((1 - \mu)p + \mu C))d &= (((1 - \mu)p + \mu C) \frac{\alpha N(C - 1)}{CK} + 1)Nd. \\
&= (((1 - \mu)p + \mu C) \frac{\alpha N(C - 1)}{CK} + 1)Nd. \\
&= (\frac{(1 - \mu)\alpha N(C - 1)}{CK}p + \frac{\mu\alpha N(C - 1)}{C} + 1)Nd.
\end{aligned} \tag{80}$$

## 360 I.2 Server sends to clients

361 Since the aggregations of neighbor features have been calculated in the server, it then needs to send  
362 the aggregations back to clients.

363 For 1-hop communication, each client requires the aggregations of neighbors (1-hop) of its local  
364 nodes, which equals to the number of local nodes times the size of the node feature,

$$\sum_{k=1}^K |\mathcal{V}_k|d = Nd. \tag{81}$$

365 For 2-hop communication, each client requires the aggregations of 2-hop neighbors of its local nodes,  
366 which equals to the number of 1-hop neighbors times the size of the node feature,

$$\sum_{k=1}^K |\mathcal{N}_{\mathcal{V}_k}|d \tag{82}$$

367 The number of neighbors in partial i.i.id for client  $k$

$$\begin{aligned}
\frac{N}{C} + \frac{C - 1}{C}N(1 - (1 - \alpha)^{\frac{Np}{CK}}(1 - \mu\alpha)^{\frac{N(C-p)}{CK}}) &\approx \frac{N}{C} + \frac{C - 1}{C}N(\alpha \frac{N}{CK}((1 - \mu)p + \mu C)) \\
&= \frac{N}{C} + \frac{C - 1}{C}N(\alpha \frac{N}{CK}(1 - \mu)p + \alpha \frac{N}{C}\mu)
\end{aligned} \tag{83}$$

368 Then the number of neighbors in partial i.i.id for for all clients

$$N + (C - 1)N(1 - (1 - \alpha)^{\frac{Np}{CK}}(1 - \mu\alpha)^{\frac{N(C-p)}{CK}}) \approx N + (C - 1)N(\alpha \frac{N}{CK}(1 - \mu)p + \alpha \frac{N}{C}\mu) \tag{84}$$

369 The communication cost is then

$$\begin{aligned}
(N + (C - 1)N(\alpha \frac{N}{CK}(1 - \mu)p + \alpha \frac{N}{CK}\mu C))d &= (1 + (C - 1)(\alpha \frac{N}{CK}(1 - \mu)p + \alpha \frac{N}{C}\mu))Nd \\
&= (1 + (C - 1)\alpha \frac{N}{CK}(1 - \mu)p + \mu\alpha(C - 1)\frac{N}{C})Nd
\end{aligned} \tag{85}$$

370 For  $L$ -hop communication, each client requires the aggregations of  $L$ -hop neighbors of its local  
371 nodes, which equals to the number of  $(L - 1)$ -hop neighbors times the size of the node feature,

$$\sum_{k=1}^K |\mathcal{N}_{\mathcal{V}_k}^{L-1}|d. \tag{86}$$

## 372 J Negative Social Impacts of the Work

373 We believe that our work overall may have a positive social impact, as it helps to protect user privacy  
374 during federated training of GCNs for node-level prediction problems. However, by enabling such  
375 training to occur without compromising privacy, there is a chance that we could enable improved  
376 training of models with negative social impact. For example, models might more accurately classify

377 users in social networks due to their ability to leverage a larger, cross-client dataset of users in the  
 378 training. Depending on the model being trained, these results could be used against such users, e.g.,  
 379 targeting dissidents under an authoritarian regime. We believe that such negative impacts are no  
 380 more likely than positive impacts from improved training, e.g., allowing an advertising company to  
 381 send better products to users through improved predictions of what they will like. This work itself is  
 382 agnostic to the specific machine learning model being trained.

## 383 References

- 384 Aleksandar Bojchevski, Johannes Gasteiger, Bryan Perozzi, Amol Kapoor, Martin Blais, Benedek  
 385 Rózemberczki, Michal Lukasik, and Stephan Günnemann. 2020. Scaling graph neural networks  
 386 with approximate pagerank. In Proceedings of the 26th ACM SIGKDD International Conference  
 387 on Knowledge Discovery & Data Mining. 2464–2473.
- 388 Jung Hee Cheon, Andrey Kim, Miran Kim, and Yongsoo Song. 2017. Homomorphic encryption for  
 389 arithmetic of approximate numbers. In International conference on the theory and application of  
 390 cryptography and information security. Springer, 409–437.
- 391 Fabrizio Frasca, Emanuele Rossi, Davide Eynard, Ben Chamberlain, Michael Bronstein, and Federico  
 392 Monti. 2020. Sign: Scalable inception graph neural networks. arXiv preprint arXiv:2004.11198  
 393 (2020).
- 394 Weihua Hu, Matthias Fey, Marinka Zitnik, Yuxiao Dong, Hongyu Ren, Bowen Liu, Michele Catasta,  
 395 and Jure Leskovec. 2020. Open graph benchmark: Datasets for machine learning on graphs.  
 396 Advances in neural information processing systems 33 (2020), 22118–22133.
- 397 Thomas N Kipf and Max Welling. 2016. Semi-supervised classification with graph convolutional  
 398 networks. arXiv preprint arXiv:1609.02907 (2016).
- 399 Brendan McMahan, Eider Moore, Daniel Ramage, Seth Hampson, and Blaise Aguera y Arcas.  
 400 2017. Communication-efficient learning of deep networks from decentralized data. In Artificial  
 401 intelligence and statistics. PMLR, 1273–1282.
- 402 PALISADE. 2020. PALISADE Release. <https://gitlab.com/palisade/palisade-release>
- 403 Cheng Wan, Youjie Li, Ang Li, Nam Sung Kim, and Yingyan Lin. 2022. BNS-GCN: Efficient full-  
 404 graph training of graph convolutional networks with partition-parallelism and random boundary  
 405 node sampling. Proceedings of Machine Learning and Systems 4 (2022), 673–693.
- 406 Felix Wu, Amauri Souza, Tianyi Zhang, Christopher Fifty, Tao Yu, and Kilian Weinberger. 2019. Sim-  
 407 plifying graph convolutional networks. In International conference on machine learning. PMLR,  
 408 6861–6871.
